# Supplementary material for: Online Movement Correction in Response to the Unexpectedly Perturbed Initial or Final Action Goals: An ERP and sLORETA Study
Source: MDPI journal article supplement (doi:10.3390/brainsci11050641), 2021-05-15
Supplement: s1 [file s1]

**Supplementary Table S5** Summary of the post hoc results for the factor *perturbation* from 700 to 1000 ms (time-locked to S2)

| Contrast     | Time window |            |             |
|--------------|-------------|------------|-------------|
|              | 700–800 ms  | 800–900 ms | 900–1000 ms |
| <b>FP–IP</b> | –1.43       | –0.94      | –0.44       |
| <b>FP–NP</b> | 4.90***     | 3.79**     | 2.89*       |
| <b>IP–NP</b> | 6.34***     | 4.73***    | 3.33**      |

Note: \*  $p < 0.05$ ; \*\*  $p < 0.01$ ; \*\*\*  $p < 0.001$
