# Supplementary material for: Online Movement Correction in Response to the Unexpectedly Perturbed Initial or Final Action Goals: An ERP and sLORETA Study
Source: MDPI journal article supplement (doi:10.3390/brainsci11050641), 2021-05-15
Supplement: s1 [file s1]

**Supplementary Table S2** Simple effect of *perturbation* for P3 amplitude (time-locked to S2) in different front-back and left-right areas

| Area       |           | RM ANOVA  |            | Post Hoc |          |
|------------|-----------|-----------|------------|----------|----------|
|            |           | <i>F</i>  | $\eta^2_G$ | Contrast | <i>t</i> |
| Front-back | Anterior  | 53.096*** | 0.283      | FP-IP    | -3.42**  |
|            |           |           |            | FP-NP    | 6.87***  |
|            |           |           |            | IP-NP    | 10.09*** |
|            | Central   | 46.38***  | 0.345      | FP-IP    | -1.62    |
|            |           |           |            | FP-NP    | 7.41***  |
|            |           |           |            | IP-NP    | 9.03***  |
|            | Posterior | 16.53***  | 0.19       | FP-IP    | -0.48    |
|            |           |           |            | FP-NP    | 4.72***  |
|            |           |           |            | IP-NP    | 5.20***  |
|            | Left      | 32.28***  | 0.251      | FP-IP    | -1.61    |
|            |           |           |            | FP-NP    | 6.01***  |
|            |           |           |            | IP-NP    | 7.62***  |
| Left-right | Middle    | 50.52***  | 0.357      | FP-IP    | -1.86    |
|            |           |           |            | FP-NP    | 7.63***  |
|            |           |           |            | IP-NP    | 9.49***  |
|            | Right     | 30.72***  | 0.249      | FP-IP    | -1.46    |
|            |           |           |            | FP-NP    | 5.94***  |
|            |           |           |            | IP-NP    | 7.40***  |

Note: \*  $p < 0.05$ ; \*\*  $p < 0.01$ ; \*\*\*  $p < 0.001$
