# Supplementary material for: Online Movement Correction in Response to the Unexpectedly Perturbed Initial or Final Action Goals: An ERP and sLORETA Study
Source: MDPI journal article supplement (doi:10.3390/brainsci11050641), 2021-05-15
Supplement: s1 [file s1]

**Supplementary Table S1    The average number (standard deviation) of trials for analysis in different experimental conditions**

|                                | <i>FP</i> | <i>IP</i> | <i>NP</i>  |
|--------------------------------|-----------|-----------|------------|
| <b>Behavioral Timing</b>       | 40(3.85)  | 41(3.05)  | 268(7.48)  |
| <b>Time-locked to the S2</b>   | 34(3.62)  | 35(3.10)  | 231(24.50) |
| <b>Time-locked to grasping</b> | 33(5.70)  | 34(5.27)  | 227(22.02) |
