# Supplementary material for: Online Movement Correction in Response to the Unexpectedly Perturbed Initial or Final Action Goals: An ERP and sLORETA Study
Source: MDPI journal article supplement (doi:10.3390/brainsci11050641), 2021-05-15
Supplement: s1 [file s1]

**Supplementary Table S3** Simple effect of *perturbation* for the mean amplitude of the slow waves during 600–700 ms (time-locked to S2) in different left–right areas

| Area                                                 |        | RM ANOVA |             | Post Hoc |          |
|------------------------------------------------------|--------|----------|-------------|----------|----------|
|                                                      |        | <i>F</i> | $\eta\_G^2$ | Contrast | <i>t</i> |
| Left–right                                           | Left   | 36.97*** | 0.125       | FP–IP    | −2.19    |
|                                                      |        |          |             | FP–NP    | 6.10***  |
|                                                      |        |          |             | IP–NP    | 8.30***  |
|                                                      | Middle | 41.28*** | 0.141       | FP–IP    | −2.52*   |
|                                                      |        |          |             | FP–NP    | 6.30***  |
|                                                      |        |          |             | IP–NP    | 8.82***  |
|                                                      | Right  | 25.76*** | 0.085       | FP–IP    | −2.03    |
|                                                      |        |          |             | FP–NP    | 4.95***  |
|                                                      |        |          |             | IP–NP    | 6.98***  |
| Note: * $p < 0.05$ ; ** $p < 0.01$ ; *** $p < 0.001$ |        |          |             |          |          |
