# Supplementary material for: Online Movement Correction in Response to the Unexpectedly Perturbed Initial or Final Action Goals: An ERP and sLORETA Study
Source: MDPI journal article supplement (doi:10.3390/brainsci11050641), 2021-05-15
Supplement: s1 [file s1]

**Supplementary Table S4    Summary of the statistical results for the slow waves from 700 to 1000 ms (time-locked to S2)**

|                                                                   | <b>Time windows</b> |            |             |
|-------------------------------------------------------------------|---------------------|------------|-------------|
|                                                                   | 700–800 ms          | 800–900 ms | 900–1000 ms |
| <b><i>Perturbation</i></b> [ $F_{(2,38)}$ ]                       | 22.08***            | 12.54***   | 6.55**      |
| <b><i>Front–back</i></b> [ $F_{(2,38)}$ ]                         | 9.43**              | 9.66**     | 6.47**      |
| <b><i>Left–right</i></b> [ $F_{(2,38)}$ ]                         | 22.82***            | 26.96***   | 24.38***    |
| <b><i>Perturbation*Front–back</i></b> [ $F_{(2,38)}$ ]            | 1.51                | 0.72       | 0.74        |
| <b><i>Perturbation*Left–right</i></b> [ $F_{(2,38)}$ ]            | 2.84                | 0.30       | 0.72        |
| <b><i>Front–back*Left–right</i></b> [ $F_{(4,76)}$ ]              | 6.13***             | 5.81**     | 4.90**      |
| <b><i>Perturbation*Front–back*Left–right</i></b> [ $F_{(4,76)}$ ] | 0.84                | 0.80       | 1.62        |

Note: \*  $p < 0.05$ ; \*\*  $p < 0.01$ ; \*\*\*  $p < 0.001$
