# Supplementary material for: Online Movement Correction in Response to the Unexpectedly Perturbed Initial or Final Action Goals: An ERP and sLORETA Study
Source: MDPI journal article supplement (doi:10.3390/brainsci11050641), 2021-05-15
Supplement: s1 [file s1]

**Supplementary Table S6    Summary of the statistical results for the ERP slow waves from –400 to 0 ms (time-locked to grasping)**

|                                                                   | Time windows |              |              |           |
|-------------------------------------------------------------------|--------------|--------------|--------------|-----------|
|                                                                   | –400––300 ms | –300––200 ms | –200––100 ms | –100–0 ms |
| <b><i>Perturbation</i></b> [ $F_{(2,38)}$ ]                       | 2.09         | 1.17         | 1.57         | 1.99      |
| <b><i>Front–back</i></b> [ $F_{(2,38)}$ ]                         | 6.91**       | 8.29***      | 9.87***      | 15.34***  |
| <b><i>Left–right</i></b> [ $F_{(2,38)}$ ]                         | 33.14***     | 36.04***     | 33.27***     | 35.54***  |
| <b><i>Perturbation*Front–back</i></b> [ $F_{(2,38)}$ ]            | 0.27         | 0.69         | 1.24         | 0.65      |
| <b><i>Perturbation*Left–right</i></b> [ $F_{(2,38)}$ ]            | 0.92         | 1.31         | 1.35         | 0.73      |
| <b><i>Front–back*Left–right</i></b> [ $F_{(4,76)}$ ]              | 4.14*        | 3.77*        | 3.57*        | 4.48*     |
| <b><i>Perturbation*Front–back*Left–right</i></b> [ $F_{(4,76)}$ ] | 0.64         | 0.98         | 1.00         | 0.82      |

Note: \*  $p < 0.05$ ; \*\*  $p < 0.01$ ; \*\*\*  $p < 0.001$
